# Supplementary material for: Safety and Efficacy of Ivermectin for the Prevention and Treatment of COVID-19: A Double-Blinded Randomized Placebo-Controlled Study
Source: MDPI journal article supplement (doi:10.3390/antibiotics11060796), 2022-06-12
Supplement: s1 [file s1]

**Supplementary Table S1: Baseline characteristics of all study participants**

|                                                                         | <b>Total<br/>n=983</b> | <b>Ivermectin<br/>n =492</b> | <b>Placebo<br/>n=491</b> | <b>P value</b> |
|-------------------------------------------------------------------------|------------------------|------------------------------|--------------------------|----------------|
| Age (years),                                                            |                        |                              |                          |                |
| Mean (SD)                                                               | 38.4 (12.1)            | 38.4 (12.3)                  | 38.4 (11.9)              | 0.972          |
| Median (range)                                                          | 38 (18, 72)            | 38 (18, 72)                  | 38 (18, 72)              | 0.883          |
| Gender, n (%)                                                           |                        |                              |                          | 0.606          |
| Male                                                                    | 419 (42.6)             | 214 (43.5)                   | 205 (41.8)               |                |
| Female                                                                  | 564 (57.4)             | 278 (56.5)                   | 286 (58.2)               |                |
| Body weight, kg                                                         |                        |                              |                          |                |
| Mean (SD)                                                               | 67.7 (16.0)            | 67.6 (16.6)                  | 67.7 (15.3)              | 0.986          |
| Median (range)                                                          | 65.7 (35.3, 142.5)     | 65.7 (35.3, 142.5)           | 65.7 (36.6, 118.5)       | 0.786          |
| ≤90 kg                                                                  | 893 (90.8)             | 446 (90.7)                   | 447 (91.0)               | 0.912          |
| >90 kg                                                                  | 90 (9.2)               | 46 (9.3)                     | 44 (9.0)                 |                |
| Presence of underlying diseases, n (%)                                  | 301 (30.6)             | 143 (29.1)                   | 158 (32.2)               | 0.300          |
| Hypertension                                                            | 97 (9.9)               | 42 (8.5)                     | 55 (11.2)                | 0.166          |
| Diabetes mellitus                                                       | 56 (5.7)               | 24 (4.9)                     | 32 (6.5)                 | 0.275          |
| Dyslipidemia                                                            | 50 (5.1)               | 22 (4.5)                     | 28 (5.7)                 | 0.388          |
| Coronary artery disease                                                 | 14 (1.4)               | 9 (1.8)                      | 5 (1.0)                  | 0.421          |
| Chronic kidney disease                                                  | 2 (0.2)                | 1 (0.2)                      | 1 (0.2)                  | 1.000          |
| Cirrhosis                                                               | 1 (0.1)                | 1 (0.2)                      | 0 (0.0)                  | 1.000          |
| Chronic lung diseases                                                   | 2 (0.2)                | 0 (0.0)                      | 2 (0.4)                  | 0.249          |
| Cerebrovascular disease                                                 | 3 (0.3)                | 0 (0.0)                      | 3 (0.6)                  | 0.124          |
| Cancer                                                                  | 8 (0.8)                | 3 (0.6)                      | 5 (1.0)                  | 0.506          |
| Autoimmune disease                                                      | 2 (0.2)                | 0 (0.0)                      | 2 (0.4)                  | 0.249          |
| Others                                                                  | 159 (16.2)             | 81 (16.5)                    | 78 (15.9)                | 0.863          |
| Duration of last exposure to COVID-19 patient until enrollment (n=808)* |                        |                              |                          | 0.714          |
| Median (range)                                                          | 2 (0, 66)              | 2 (0, 25)                    | 2 (0, 66)                | 0.844          |
| ≤ 7 days, n (%)                                                         | 735 (91.0)             | 365 (90.6)                   | 370 (91.4)               | 0.714          |
| >7 days, n (%)                                                          | 73 (9.0)               | 38 (9.4)                     | 35 (8.6)                 |                |
| Exposure risk: household contact, n (%)                                 | 809 (82.3)             | 403 (81.9)                   | 406 (82.7)               | 0.802          |
| Presence of symptom, n (%)                                              |                        |                              |                          |                |
| Asymptomatic                                                            | 258 (26.2)             | 128 (26.0)                   | 130 (26.5)               | 0.885          |

|                                                                                                  |            |            |            |       |
|--------------------------------------------------------------------------------------------------|------------|------------|------------|-------|
| Symptomatic                                                                                      | 725 (73.8) | 364 (74.0) | 361 (73.5) |       |
| Sore throat                                                                                      | 396 (40.3) | 206 (41.9) | 190 (38.7) | 0.330 |
| Cough                                                                                            | 362 (36.8) | 186 (37.8) | 176 (35.8) | 0.552 |
| Runny nose                                                                                       | 245 (24.9) | 128 (26.0) | 117 (23.8) | 0.461 |
| Fever                                                                                            | 243 (24.7) | 122 (24.8) | 121 (24.6) | 1.000 |
| Loss of smell/ taste                                                                             | 83 (8.4)   | 34 (6.9)   | 49 (10.0)  | 0.087 |
| Dyspnea                                                                                          | 58 (5.9)   | 30 (6.1)   | 28 (5.7)   | 0.892 |
| Diarrhea                                                                                         | 44 (4.5)   | 21 (4.3)   | 23 (4.7)   | 0.761 |
| Chest pain                                                                                       | 11 (1.1)   | 4 (0.8)    | 7 (1.4)    | 0.385 |
| Vomiting                                                                                         | 7 (0.7)    | 5 (1.0)    | 2 (0.4)    | 0.451 |
| Others                                                                                           | 240 (24.4) | 122 (24.8) | 118 (24.0) | 0.824 |
| Duration (days) of illness (n=725) **                                                            |            |            |            |       |
| Median (range)                                                                                   | 2 (0, 20)  | 2 (0, 20)  | 2 (0, 14)  | 0.746 |
| < 3 days, n (%)                                                                                  | 410 (56.6) | 203 (55.9) | 207 (57.3) | 0.708 |
| ≥ 3 days, n (%)                                                                                  | 314 (43.4) | 160 (44.1) | 154 (42.7) |       |
| Positive RT-PCR, n (%)                                                                           | 447 (45.5) | 233 (47.4) | 214 (43.6) | 0.249 |
| Previous COVID-19 vaccination, n (%)                                                             |            |            |            | 0.482 |
| No                                                                                               | 197 (20.0) | 110 (22.4) | 87 (17.7)  |       |
| Incomplete course of vaccine<br>(1 dose with last dose < 2 weeks)                                | 64 (6.5)   | 30 (6.1)   | 34 (6.9)   |       |
| Incomplete course of vaccine<br>(1 dose with last dose ≥ 2 weeks)                                | 369 (37.5) | 182 (37.0) | 187 (38.1) |       |
| Complete course of vaccine<br>(2 doses with last dose < 2 weeks)                                 | 89 (9.1)   | 43 (8.7)   | 46 (9.4)   |       |
| Complete course of vaccine<br>(2 doses with last dose ≥ 2 weeks or 3<br>doses with any duration) | 264 (26.9) | 127 (25.8) | 137 (27.9) |       |
| Compliance of study medication                                                                   |            |            |            | 0.752 |
| Full compliance, n (%)                                                                           | 884 (89.9) | 444 (90.2) | 440 (89.6) |       |
| Partial compliance, n (%)                                                                        | 99 (10.1)  | 48 (9.8)   | 51 (10.4)  |       |

\*Duration of last exposure to COVID-19 patients until enrollment, data was available in 808 participants

\*\*Duration of illness: duration of illness prior to enrollment (only in symptomatic patients)

**Supplementary Table S2: Primary outcomes in subgroup population of ivermectin prevention study by analysis of mITT population**

| Subgroup analysis of ivermectin prevention study                                                     | Ivermectin    | Placebo       | p-value |
|------------------------------------------------------------------------------------------------------|---------------|---------------|---------|
| Proportion of participants with positive RT-PCR or rapid antigen test in subgroup population (n=525) | n=253         | n=272         |         |
| By duration of last exposure to enrollment, n (%) <sup>*</sup>                                       |               |               |         |
| ≤7 days                                                                                              | 12/214 (5.61) | 14/219 (6.39) | 0.840   |
| >7days                                                                                               | 0/26 (0.00)   | 0/26 (0.00)   |         |
| By body weight (kg), n (%)                                                                           |               |               |         |
| ≤90 kg                                                                                               | 11/226 (4.87) | 12/250 (4.80) | 1.000   |
| >90 kg                                                                                               | 1/27 (3.70)   | 2/22 (9.09)   | 0.581   |
| By vaccination status, n (%) <sup>**</sup>                                                           |               |               |         |
| No immune                                                                                            | 3/57 (5.26)   | 4/60 (6.67)   | 1.000   |
| Partially immune                                                                                     | 8/123 (6.50)  | 4/122 (3.28)  | 0.376   |
| Fully immune                                                                                         | 1/73 (1.37)   | 6/90 (6.67)   | 0.131   |

<sup>\*</sup>Duration of last exposure with COVID-19 patient to enrollment was available in 483 participants (92%);

<sup>\*\*</sup>Vaccination status was classified into three groups: no immune (never receive COVID-19 vaccine or received one dose of any vaccine less than 2 weeks), partially immune (received one dose of any vaccine 2 weeks or longer or two dose of any vaccine less than 2 weeks) and fully immune (received two dose of any vaccine more than 2 weeks or receive third dose booster for any duration).

**Supplementary Table S3: Primary outcomes in subgroup population of ivermectin treatment study by analysis of mITT population**

| Subgroup analysis of ivermectin treatment study                   | Ivermectin     | Placebo        | <i>P</i> value |
|-------------------------------------------------------------------|----------------|----------------|----------------|
| mITT population (n=443)                                           | n=229          | n=214          |                |
| Body weight (kg)                                                  |                |                |                |
| BW ≤90 kg (n=402)                                                 | n=210          | n=192          |                |
| Proportion of participants with oxygen desaturation, n (%)        |                |                |                |
| Day 3                                                             | 2/210 (1.0)    | 3/192 (1.6)    | 0.673          |
| Day 7                                                             | 2/208 (1.0)    | 4/189 (2.1)    | 0.430          |
| Day 14                                                            | 5/206 (2.4)    | 3/191 (1.6)    | 0.725          |
| Change of WHO progression score from baseline, n (%)              |                |                |                |
| Day 3                                                             | 0 (-3, 0)      | 0 (-5, 0)      | 0.364          |
| Day 7                                                             | 0 (-4, 0)      | 0 (-5, 0)      | 0.306          |
| Day 14                                                            | 1 (-5, 1)      | 1 (-5, 1)      | 0.384          |
| Absence of symptom, n (%)                                         |                |                |                |
| Day 3                                                             | 47/210 (22.4)  | 39/192 (20.3)  | 0.628          |
| Day 7                                                             | 108/210 (51.4) | 102/192 (53.1) | 0.765          |
| Day 14                                                            | 161/210 (76.7) | 161/192 (83.9) | 0.080          |
| Hospitalization due to clinical progression within 14 days, n (%) | 3/210 (1.4)    | 3/192 (1.6)    | 1.000          |
| BW >90 kg (n=41)                                                  | n=19           | n=22           |                |
| Proportion of participants with oxygen desaturation, n (%)        |                |                |                |
| Day 3                                                             | 0/19 (0.0)     | 0/22 (0.0)     | 0.676          |
| Day 7                                                             | 0/19 (0.0)     | 0/22 (0.0)     | 0.435          |

|                                                                   |               |               |       |
|-------------------------------------------------------------------|---------------|---------------|-------|
| Day 14                                                            | 1/18 (5.6)    | 1/21(4.8)     | 1.000 |
| Change of WHO progression score from baseline                     |               |               |       |
| Day 3                                                             | 0 (-3, 0)     | 0 (-1, 0)     | 0.798 |
| Day 7                                                             | 0 (-3, 0)     | 0 (-4, 0)     | 0.557 |
| Day 14                                                            | 1 (0, 1)      | 1 (-2, 1)     | 0.740 |
| Absence of symptom, n (%)                                         |               |               |       |
| Day 3                                                             | 9/19 (47.4)   | 5/22 (22.7)   | 0.115 |
| Day 7                                                             | 10/19 (52.6)  | 13/22 (59.1)  | 0.758 |
| Day 14                                                            | 13/19 (68.4)  | 15/22 (68.2)  | 1.000 |
| Hospitalization due to clinical progression within 14 days, n (%) | 1/19 (5.3)    | 1/22 (4.5)    | 1.000 |
| Duration of illness                                               |               |               |       |
| Duration <3 days (n=218)                                          | n=114         | n=104         |       |
| Proportion of participants with oxygen desaturation, n (%)        |               |               |       |
| Day 3                                                             | 2/114 (1.8)   | 1/104 (1.0)   | 1.000 |
| Day 7                                                             | 2/113 (1.8)   | 1/103 (1.0)   | 1.000 |
| Day 14                                                            | 4/111 (3.6)   | 2/103 (1.9)   | 0.684 |
| Change of WHO progression score from baseline, n (%)              |               |               |       |
| Day 3                                                             | 0 (-3, 0)     | 0 (-3, 0)     | 0.439 |
| Day 7                                                             | 0 (-4, 0)     | 0 (-3, 0)     | 0.676 |
| Day 14                                                            | 1 (-5, 1)     | 1 (-2, 1)     | 0.258 |
| Absence of symptom                                                |               |               |       |
| Day 3                                                             | 25/114 (21.9) | 19/104 (18.3) | 0.613 |
| Day 7                                                             | 57/114 (50.0) | 50/104 (48.1) | 0.788 |

|                                                                   |               |               |       |
|-------------------------------------------------------------------|---------------|---------------|-------|
| Day 14                                                            | 88/114 (77.2) | 86/104 (82.7) | 0.399 |
| Hospitalization due to clinical progression within 14 days, n (%) | 3/114 (2.6)   | 2/104 (1.9)   | 1.000 |
| Duration $\geq 3$ days (n=173)                                    | n=91          | n=82          |       |
| Proportion of participants with oxygen desaturation, n (%)        |               |               |       |
| Day 3                                                             | 0/91 (0.0)    | 2/82 (2.4)    | 0.223 |
| Day 7                                                             | 0/90 (0.0)    | 2/80 (2.5)    | 1.000 |
| Day 14                                                            | 2/90 (2.2)    | 1/82 (1.2)    | 1.000 |
| Change of WHO progression score from baseline, n (%)              |               |               |       |
| Day 3                                                             | 0 (-3, 0)     | 0 (-3, 0)     | 0.387 |
| Day 7                                                             | 0 (-2, 0)     | 0 (-4, 0)     | 0.109 |
| Day 14                                                            | 1 (0, 1)      | 1 (-2, 1)     | 0.374 |
| Absence of symptom, n (%)                                         |               |               |       |
| Day 3                                                             | 24/91 (26.4)  | 15/82 (18.3)  | 0.274 |
| Day 7                                                             | 46/91 (50.5)  | 46/82 (56.1)  | 0.542 |
| Day 14                                                            | 66/91 (72.5)  | 67/82 (81.7)  | 0.206 |
| Hospitalization due to clinical progression within 14 days        | 0/91 (0.0)    | 2/82 (2.4)    | 0.223 |
| Cycle threshold (Ct) value                                        |               |               |       |
| Ct <20 (n=264)                                                    | n=139         | n=125         |       |
| Proportion of participants with oxygen desaturation, n (%)        |               |               |       |
| Day 3                                                             | 1/139 (0.7)   | 2/125 (1.6)   | 0.605 |
| Day 7                                                             | 2/138 (1.4)   | 2/124 (1.6)   | 1.000 |
| Day 14                                                            | 5/135 (3.7)   | 1/124 (0.8)   | 0.216 |
| Change of WHO progression score from baseline, n (%)              |               |               |       |

|                                                                   |                |                |       |
|-------------------------------------------------------------------|----------------|----------------|-------|
| Day 3                                                             | 0 (-3, 0)      | 0 (-3, 0)      | 0.956 |
| Day 7                                                             | 0 (-4, 0)      | 0 (-3, 0)      | 0.946 |
| Day 14                                                            | 1 (-5, 1)      | 1 (-2, 1)      | 0.160 |
| Absence of symptom, n (%)                                         |                |                |       |
| Day 3                                                             | 29/139 (20.9)  | 21/125 (16.8)  | 0.434 |
| Day 7                                                             | 62/139 (44.6)  | 61/125 (48.8)  | 0.538 |
| Day 14                                                            | 102/139 (73.4) | 105/125 (84.0) | 0.051 |
| Hospitalization due to clinical progression within 14 days, n (%) | 4/139 (2.9)    | 2/125 (1.6)    | 0.687 |
| <hr/>                                                             |                |                |       |
| Ct $\geq$ 20 (n=179)                                              | n=90           | n=89           |       |
| Proportion of participants with oxygen desaturation, n (%)        |                |                |       |
| Day 3                                                             | 1/90 (1.1)     | 1/89 (1.1)     | 1.000 |
| Day 7                                                             | 0/89 (0.0)     | 2/87 (2.3)     | 0.243 |
| Day 14                                                            | 1/89 (1.1)     | 3/88 (3.4)     | 0.368 |
| Change of WHO progression score from baseline, n (%)              |                |                |       |
| Day 3                                                             | 0 (-3, 0)      | 0 (-5, 0)      | 0.327 |
| Day 7                                                             | 0 (-2, 0)      | 0 (-5, 0)      | 0.109 |
| Day 14                                                            | 1 (-1, 1)      | 1 (-5, 1)      | 0.562 |
| Absence of symptom, n (%)                                         |                |                |       |
| Day 3                                                             | 27/90 (30.0)   | 23/89 (25.8)   | 0.618 |
| Day 7                                                             | 56/90 (62.2)   | 54/89 (60.7)   | 0.879 |
| Day 14                                                            | 72/90 (80.0)   | 71/89 (79.8)   | 0.559 |
| Hospitalization due to clinical progression within 14 days, n (%) | 0/90 (0.0)     | 2/89 (2.2)     | 0.246 |

| With or without Favipiravir (FVP)                                 |                |                |       |
|-------------------------------------------------------------------|----------------|----------------|-------|
| With FVP (n=432)                                                  | n=223          | n=209          |       |
| Proportion of participants with oxygen desaturation, n (%)        |                |                |       |
| Day 3                                                             | 2/223 (0.9)    | 3/209 (1.4)    | 0.676 |
| Day 7                                                             | 2/221 (0.9)    | 3/206 (1.5)    | 0.676 |
| Day 14                                                            | 6/218 (2.8)    | 4/207 (1.9)    | 0.752 |
| Change of WHO progression score from baseline, n (%)              |                |                |       |
| Day 3                                                             | 0 (-3, 0)      | 0 (-5, 0)      | 0.287 |
| Day 7                                                             | 0 (-4, 0)      | 0 (-5, 0)      | 0.143 |
| Day 14                                                            | 0 (-2, 1)      | 1 (-5, 1)      | 0.288 |
| Absence of symptom, n (%)                                         |                |                |       |
| Day 3                                                             | 52/223 (23.3)  | 43/209 (20.6)  | 0.561 |
| Day 7                                                             | 114/223 (51.1) | 114/209 (54.5) | 0.500 |
| Day 14                                                            | 168/223 (75.3) | 172/209 (82.3) | 0.079 |
| Hospitalization due to clinical progression within 14 days, n (%) | 4/223 (1.8)    | 4/209 (1.9)    | 1.000 |
| Without FVP (n=11)                                                | n=6            | n=5            |       |
| Proportion of participants with oxygen desaturation, n (%)        |                |                |       |
| Day 3                                                             | 0/6 (0.0)      | 0/5 (0.0)      |       |
| Day 7                                                             | 0/6 (0.0)      | 1/5 (20.0)     | 0.455 |
| Day 14                                                            | 0/6 (0.0)      | 0/5 (0.0)      |       |
| Change of WHO progression score from baseline                     |                |                |       |
| Day 3                                                             | -0.5 (-2, 0)   | 0 (-1, 0)      | 0.329 |
| Day 7                                                             | -0.5 (-2, 0)   | 0 (-1, 0)      | 0.329 |



|                                                                |              |               |       |
|----------------------------------------------------------------|--------------|---------------|-------|
| Day 14                                                         | 1 (0, 1)     | 0 (-2, 0)     | 0.052 |
| Absence of symptom, n (%)                                      |              |               |       |
| Day 3                                                          | 4/6 (66.7)   | 1/5 (20.0)    | 0.242 |
| Day 7                                                          | 4/6 (66.7)   | 1/5 (20.0)    | 0.242 |
| Day 14                                                         | 6/6 (100.0)  | 4/5 (80.0)    | 0.455 |
| Hospitalization due to clinical progression within 14 days (%) | 0/6 (0.0)    | 0/5 (0.0)     |       |
| COVID-19 vaccination status                                    |              |               |       |
| No vaccination (n=141)                                         | n=81         | n=60          |       |
| Change of WHO progression score from baseline, n (%)           |              |               |       |
| Day 3                                                          | 7 (8.6)      | 11 (18.3)     | 0.125 |
| Day 7                                                          | 7 (8.6)      | 12 (20.0)     | 0.079 |
| Day 14                                                         | 2 (2.5)      | 5 (8.3)       | 0.136 |
| Absence of symptom, n (%)                                      |              |               |       |
| Day 3                                                          | 16 (19.8)    | 10 (16.7)     | 0.668 |
| Day 7                                                          | 38 (46.9)    | 27 (45.0)     | 0.865 |
| Day 14                                                         | 63 (77.8)    | 49 (81.7)     | 0.675 |
| Incomplete course of vaccine (n=207)                           | n=99         | n=108         |       |
| Change of WHO progression score from baseline, n (%)           |              |               |       |
| Day 3                                                          | 17/99 (17.2) | 19/108 (17.6) | 1.000 |
| Day 7                                                          | 17/99 (17.2) | 22/108 (20.4) | 0.597 |
| Day 14                                                         | 4/99 (4.0)   | 1/108 (0.9)   | 0.195 |
| Absence of symptom, n (%)                                      |              |               |       |
| Day 3                                                          | 23/99 (23.2) | 21/108 (19.4) | 0.610 |
| Day 7                                                          | 49/99 (49.5) | 61/108 (56.5) | 0.332 |

|                                                      |              |               |       |
|------------------------------------------------------|--------------|---------------|-------|
| Day 14                                               | 74/99 (74.7) | 87/108 (80.6) | 0.403 |
| Complete course of vaccine (n=95)                    | n=49         | n=46          |       |
| Change of WHO progression score from baseline, n (%) |              |               |       |
| Day 3                                                | 9/49 (18.4)  | 7/46 (15.2)   | 0.787 |
| Day 7                                                | 9/49 (18.4)  | 6/46 (13.0)   | 0.578 |
| Day 14                                               | 2/49 (4.1)   | 2/46 (4.3)    | 1.000 |
| Absence of symptom, n (%)                            |              |               |       |
| Day 3                                                | 17/49 (34.7) | 13/46 (28.3)  | 0.517 |
| Day 7                                                | 31/49 (63.3) | 27/46 (58.7)  | 0.679 |
| Day 14                                               | 37/49 (75.5) | 40/46 (87.0)  | 0.195 |

**Table S4: Factors associated with favorable outcome at Day 7 in treatment study**

| <b>Variables</b>                               | <b>Presence of<br/>symptom (n=210)</b> | <b>Absence of<br/>symptom (n=233)</b> | <b><i>P</i> value</b> |
|------------------------------------------------|----------------------------------------|---------------------------------------|-----------------------|
| Age (years), Mean (SD)                         | 38.3 (40.4)                            | 40.4 (12.1)                           | 0.068                 |
| Gender, n (%)                                  |                                        |                                       | 0.056                 |
| Male                                           | 81 (38.6)                              | 111 (47.6)                            |                       |
| Female                                         | 129 (61.4)                             | 122 (52.4)                            |                       |
| Weight (kg), Mean (SD)                         | 66.9 (15.4)                            | 70.0 (16.7)                           | 0.044                 |
| ≤90 kg, n (%)                                  | 192 (91.4)                             | 210 (90.1)                            | 0.743                 |
| >90 kg, n (%)                                  | 18 (8.6)                               | 23 (9.9)                              |                       |
| Presence of underlying diseases, n (%)         |                                        |                                       |                       |
| Diabetes mellitus                              | 15 (7.1)                               | 16 (6.9)                              | 1.000                 |
| Hypertension                                   | 22 (10.5)                              | 26 (11.2)                             | 0.879                 |
| Dyslipidemia                                   | 14 (6.7)                               | 11 (4.7)                              | 0.414                 |
| CAD                                            | 3 (1.4)                                | 5 (2.1)                               | 0.727                 |
| CKD                                            | 1 (0.5)                                | 1 (0.4)                               | 1.000                 |
| Cirrhosis                                      | 1 (0.5)                                | 0 (0.0)                               | 0.474                 |
| Chronic lung diseases                          | 1 (0.5)                                | 0 (0.0)                               | 0.474                 |
| CVA                                            | 1 (0.5)                                | 0 (0.0)                               | 0.474                 |
| Cancer                                         | 0 (0.0)                                | 1 (0.4)                               | 1.000                 |
| Autoimmune disease                             | 1 (0.5)                                | 1 (0.4)                               | 1.000                 |
| Others                                         | 33 (15.7)                              | 29 (12.4)                             | 0.340                 |
| Risk of exposure: Family contact (Know), n (%) | 148 (70.5)                             | 162 (69.5)                            | 0.836                 |

|                                                           |            |            |       |
|-----------------------------------------------------------|------------|------------|-------|
| Duration of last contact until swab (n=313),<br>n (%)     |            |            | 0.498 |
| $\leq 7$ days                                             | 139 (94.6) | 149 (92.0) |       |
| $>7$ days                                                 | 8 (5.4)    | 13 (8.0)   |       |
| Duration of illness prior to enrollment<br>(n=394), n (%) |            |            |       |
| $\leq 3$ days                                             | 154 (80.2) | 146 (73.4) | 0.120 |
| $>3$ days                                                 | 38 (19.8)  | 53 (26.6)  |       |
| WHO clinical score at baseline, n (%)                     |            |            |       |
| Score 1                                                   | 17 (8.1)   | 34 (14.6)  | 0.037 |
| Score 2                                                   | 193 (91.9) | 199 (85.4) |       |
| Previous vaccination, n (%)                               |            |            | 0.079 |
| No                                                        | 76 (36.2)  | 65 (27.9)  |       |
| Incomplete course of vaccine                              | 97 (46.2)  | 110 (47.2) |       |
| Complete course of vaccine                                | 37 (17.6)  | 58 (24.9)  |       |
| Medication, n (%)                                         |            |            |       |
| Favipiravir                                               | 204 (97.1) | 228 (97.9) | 0.763 |
| Others (Steroid, <i>Andrographis<br/>paniculata</i> )     | 0 (0.0)    | 3 (1.3)    | 0.250 |
| Receiving study medications, n (%)                        |            |            | 0.703 |
| Ivermectin                                                | 111 (52.9) | 118 (50.6) |       |
| Placebo                                                   | 99 (47.1)  | 115 (49.4) |       |

**Supplementary Table S5: Adverse events of study medication separated by prevention or treatment study**

| Symptoms<br>(Modified-ITT) | Treatment study    |           |                 |           |         | Prevention study      |           |                 |           |         |
|----------------------------|--------------------|-----------|-----------------|-----------|---------|-----------------------|-----------|-----------------|-----------|---------|
|                            | Ivermectin (n=253) |           | Placebo (n=272) |           | p-value | Ivermectin<br>(n=229) |           | Placebo (n=214) |           | p-value |
|                            | no.                | no. case  | no.             | no. case  |         | no.                   | no. case  | no.             | no. case  |         |
|                            | events             | n (%)     | events          | n (%)     |         | events                | n (%)     | events          | n (%)     |         |
| Total                      | 72                 | 53 (20.9) | 67              | 49 (18.0) | 0.440   | 69                    | 51 (22.3) | 77              | 43 (20.1) | 0.642   |
| Ocular problems            | 23                 | 22 (8.7)  | 0               | 0 (0.0)   | <0.001  | 5                     | 5 (2.2)   | 4               | 3 (1.4)   | 0.725   |
| Diarrhea                   | 9                  | 9 (3.6)   | 11              | 10 (3.7)  | 1.000   | 14                    | 14 (6.1)  | 10              | 9 (4.2)   | 0.399   |
| Myalgia                    | 7                  | 6 (2.4)   | 7               | 7 (2.6)   | 1.000   | 8                     | 7 (3.1)   | 12              | 10 (4.7)  | 0.461   |
| Headache                   | 1                  | 1 (0.4)   | 8               | 8 (2.9)   | 0.039   | 9                     | 8 (3.5)   | 17              | 14 (6.5)  | 0.189   |
| Neurologic ADR             | 2                  | 2 (0.8)   | 2               | 2 (0.7)   | 1.000   | 6                     | 6 (2.6)   | 9               | 8 (3.7)   | 0.592   |
| Rash                       | 3                  | 3 (1.2)   | 3               | 3 (1.1)   | 1.000   | 4                     | 4 (1.7)   | 1               | 1 (0.5)   | 0.374   |
| Nausea/ vomiting           | 1                  | 1 (0.4)   | 5               | 5 (1.8)   | 0.218   | 5                     | 5 (2.2)   | 7               | 6 (2.8)   | 0.765   |
| Pruritus                   | 1                  | 1 (0.4)   | 2               | 2 (0.7)   | 1.000   | 0                     | 0 (0.0)   | 1               | 1 (0.5)   | 0.483   |
| Others                     | 25                 | 23 (9.1)  | 29              | 29 (10.7) | 0.562   | 18                    | 17 (7.4)  | 16              | 15 (7.0)  | 1.000   |
