# Supplementary figures and images for: Safety and Efficacy of Ivermectin for the Prevention and Treatment of COVID-19: A Double-Blinded Randomized Placebo-Controlled Study
Source: MDPI journal article supplement (doi:10.3390/antibiotics11060796), 2022-06-12

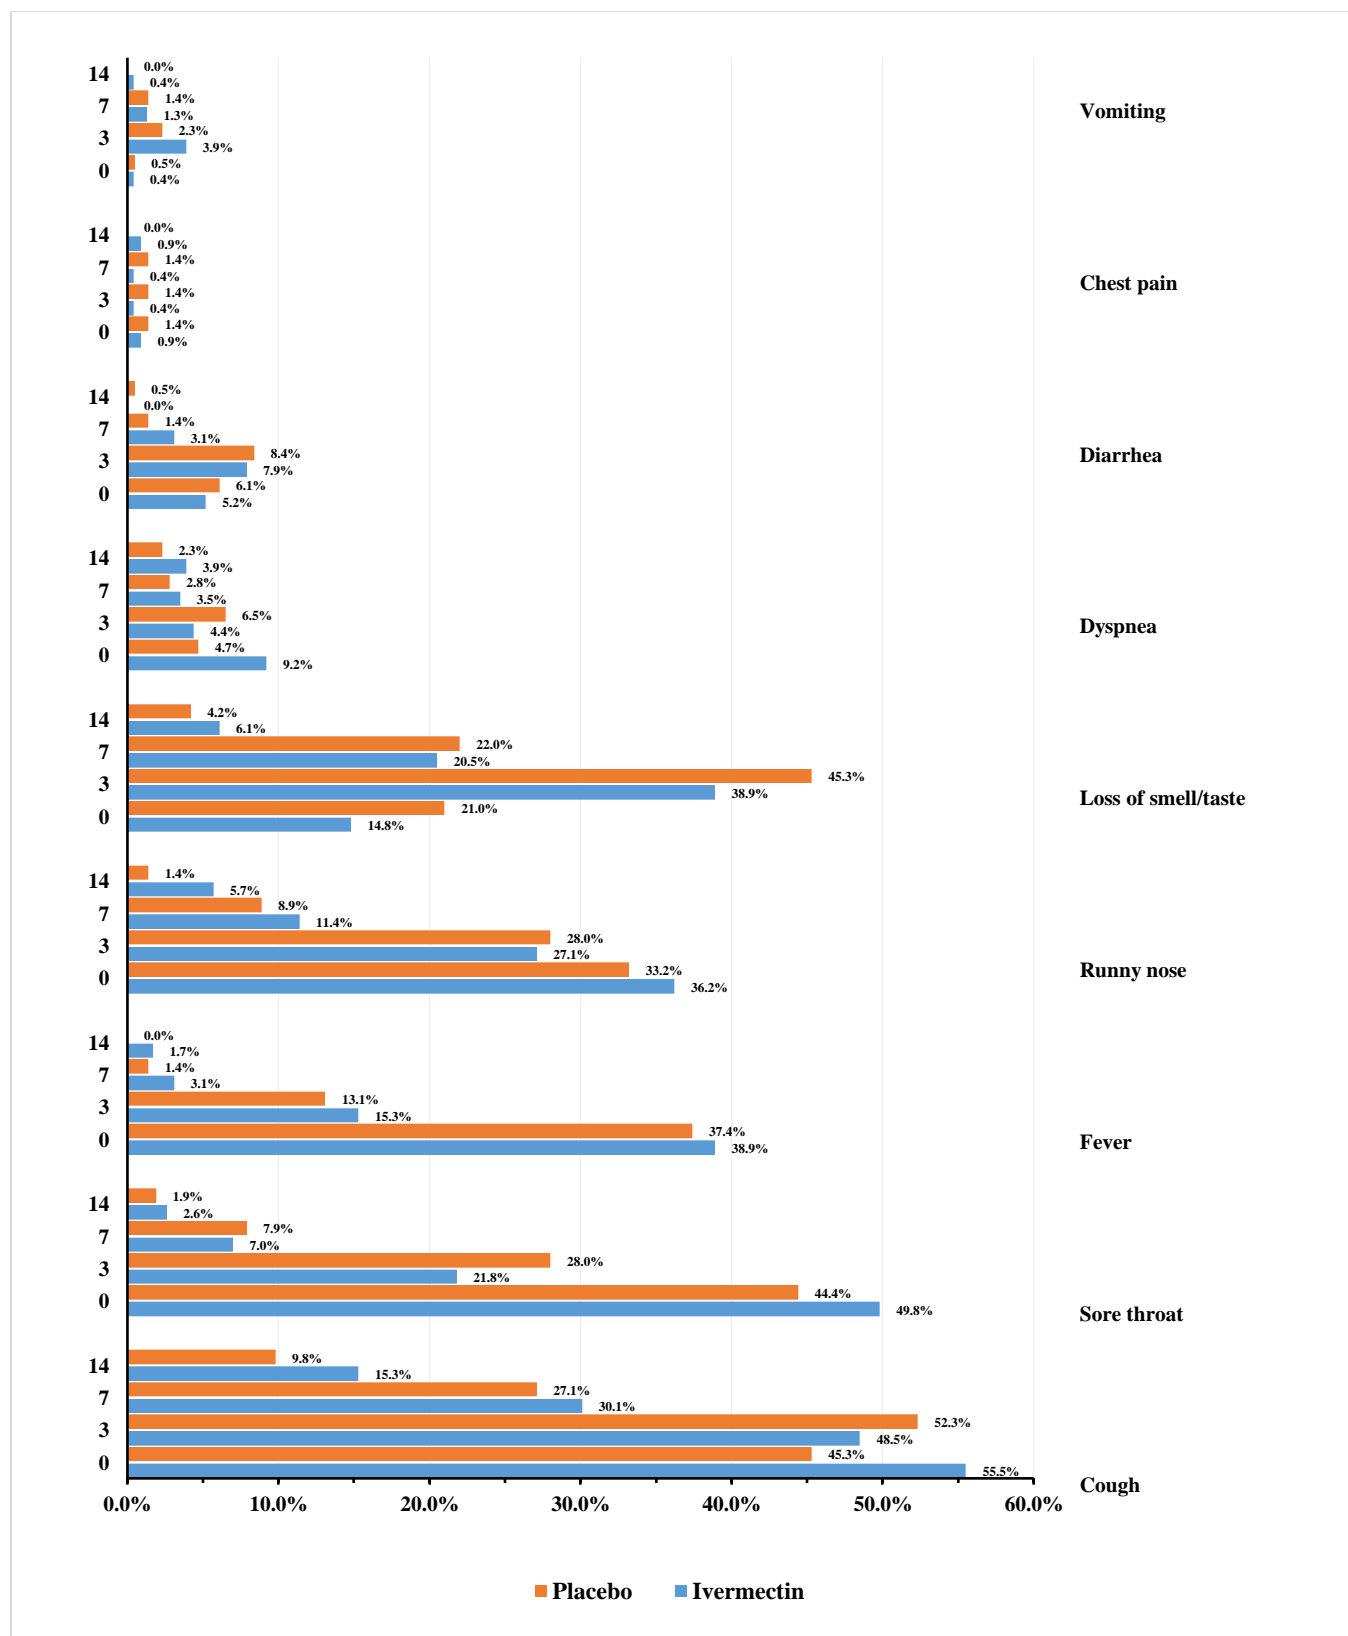

Supplementary Figure S1

Supplement: s1 [file s1]
